# Supplementary material
Source: Springer Nature journal article supplement (https://www.springermedizin.de/resource/supplementary/12885_2011_2971_MOESM5_ESM.pdf/9462352)

Control

100  $\mu$ M

150  $\mu$ M

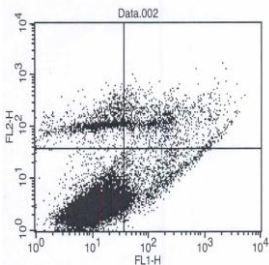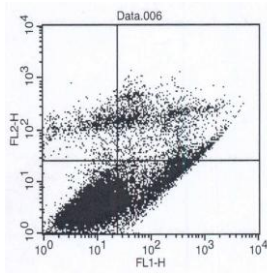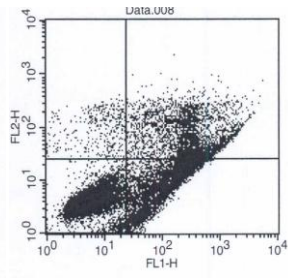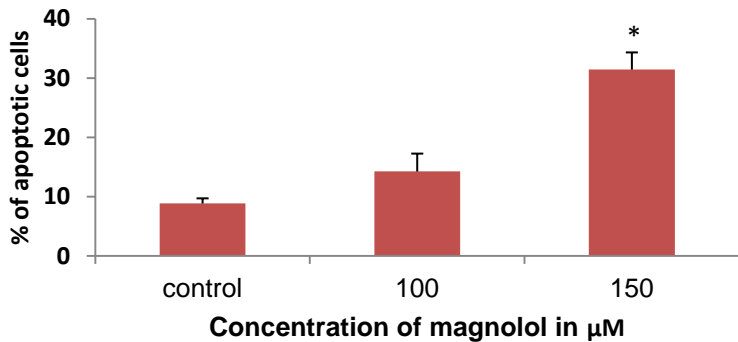

Supplement: MOESM5 [file 9462352]
